# Supplementary material for: Photochromism of spiropyrans and spirooxazines in the solid state: low temperature enhances photocoloration
Source: Royal Society of Chemistry journal article supplement (doi:10.1039/b925514a), 2010-01-01
Supplement: b925514a.pdf [file b925514a.pdf]

## Experimental

**Materials.** Melting points were determined on a micro hot stage apparatus and are uncorrected. 1,3,3-Trimethylspiro[indoline-2,3'-[3*H*]-naphtho[2,1-*b*]pyran] (**1**) and 1,3,3-Trimethylspiro[indoline-2,3'-[3*H*]-naphth[2,1-*b*][1,4]oxazine] (**2**) were purchased from Tokyo Chemical Industry. Slow evaporation of acetone solution of **1** yielded the pale pink single crystals (mp 179 °C), which were used for the photoreactions illustrated in Fig. 1 and X-ray diffraction analysis. Spectral studies of **1** were performed using the purchased microcrystalline powder without purification. The averaged particle size of the powder was 20 µm. Slow evaporation of methanol solution of **2** yielded a mixture of two differently shaped colorless crystals (octahedral and plate), which correspond to the reported dimorphs of **2**.<sup>1</sup> The octahedral single crystals (mp 144 °C) were selected and used for the photoreactions illustrated in Fig. 1 and X-ray diffraction analysis. The octahedral crystals of **2** grown from acetone solution were crushed to microcrystalline powder with particle size ranging from 50 to 100 µm and used for spectral studies. X-ray powder diffraction of the microcrystalline powders of **1** and **2** was measured using a Rigaku MultiFlex powder diffractometer and was confirmed to be identical with the patterns calculated from their crystal structures.

**Spectral measurements.** Diffuse UV-vis reflectance spectra were measured on a JASCO V-550 spectrometer equipped with an integrating sphere accessory at temperatures between 78 and 300 K, using a liquid nitrogen bath cryostat OXFORD Optistat DN-V with a homemade sample holder. The temperature was held constant within  $\pm 0.1$  K during the measurement. NaCl powder (MERCK Suprapur) was ground and used as the reference.

**Photoirradiation.** A SAN-EI UVF-352S high pressure mercury lamp was used for UV light irradiation. The emission line of 365 nm was isolated by using a band-pass filter (ASAHI Spectra MX0365) and a heat absorption filter (HOYA HA30).

**Reference.** 1. Millini, R.; Piero, G. D.; Allegrini, P.; Crisci, L.; Malatesta, V. *Acta Crystallogr.* **1991**, *C47*, 2567–2569.

**Table S1.** Crystal Data and Structure Refinements for **1** and **2**

| compound                                                        | <b>1</b>                           |             | <b>2</b>                                         |             |
|-----------------------------------------------------------------|------------------------------------|-------------|--------------------------------------------------|-------------|
| empirical formula                                               | C <sub>23</sub> H <sub>21</sub> NO |             | C <sub>22</sub> H <sub>20</sub> N <sub>2</sub> O |             |
| formula weight                                                  | 327.41                             |             | 328.40                                           |             |
| temperature (K)                                                 | room temperature                   | 90          | room temperature                                 | 90          |
| crystal system                                                  | monoclinic                         |             | orthorhombic                                     |             |
| space group                                                     | <i>P2<sub>1</sub>/n</i>            |             | <i>Pbca</i>                                      |             |
| color of crystal                                                | pale pink                          |             | colorless                                        |             |
| <i>a</i> (Å)                                                    | 14.6137(12)                        | 14.5329(7)  | 17.1642(8)                                       | 17.275(2)   |
| <i>b</i> (Å)                                                    | 6.3473(5)                          | 6.2561(3)   | 16.8250(8)                                       | 16.559(2)   |
| <i>c</i> (Å)                                                    | 19.4928(16)                        | 19.3262(10) | 12.4068(6)                                       | 12.2061(17) |
| $\beta$ (°)                                                     | 103.501(2)                         | 103.547(1)  | 90.0                                             | 90.0        |
| <i>V</i> (Å <sup>3</sup> )                                      | 1758.1(2)                          | 1708.24(15) | 3582.9(3)                                        | 3491.6(8)   |
| <i>Z</i>                                                        | 4                                  |             | 8                                                |             |
| reflections collected                                           | 26272                              | 25364       | 53515                                            | 52107       |
| independent reflections                                         | 5123                               | 4986        | 5238                                             | 5101        |
| <i>R</i> <sub>int</sub>                                         | 0.0382                             | 0.0388      | 0.0258                                           | 0.0174      |
| data/restraints/parameters                                      | 5123/0/310                         | 4986/0/310  | 5238/0/306                                       | 5101/0/306  |
| goodness-of-fit on <i>F</i> <sup>2</sup>                        | 1.024                              | 1.040       | 1.049                                            | 1.056       |
| <i>R</i> [ <i>F</i> <sup>2</sup> > 2σ( <i>F</i> <sup>2</sup> )] | 0.0531                             | 0.0541      | 0.0554                                           | 0.0448      |
| <i>wR</i> ( <i>F</i> <sup>2</sup> ) (all data)                  | 0.1588                             | 0.1421      | 0.1645                                           | 0.1284      |
| $\rho_{\min}$ (e Å <sup>-3</sup> )                              | -0.160                             | -0.225      | -0.171                                           | -0.172      |
| $\rho_{\max}$ (e Å <sup>-3</sup> )                              | 0.270                              | 0.544       | 0.292                                            | 0.509       |

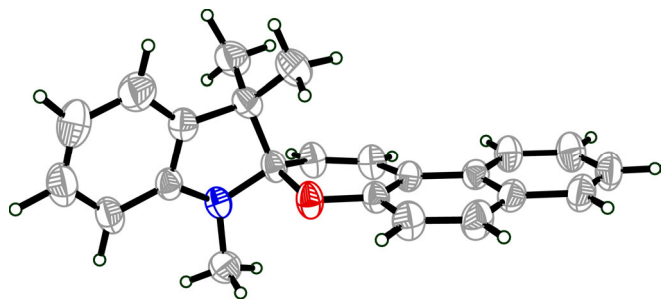

1 at room temperature

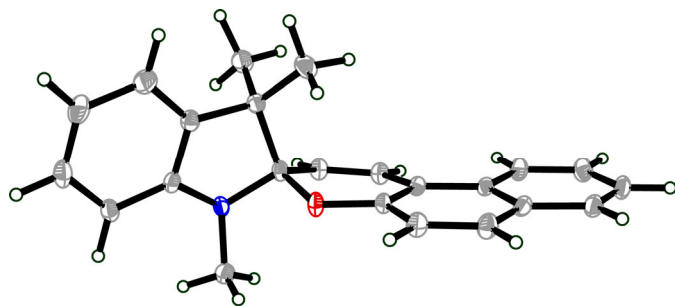

1 at 90 K

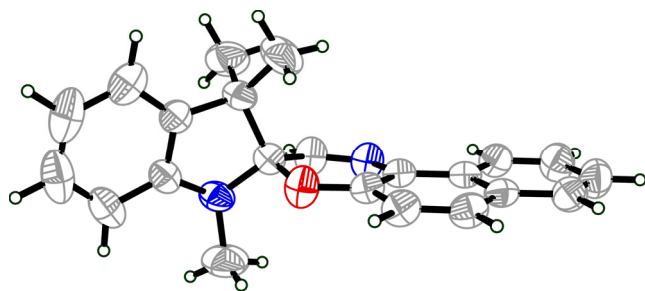

2 at room temperature

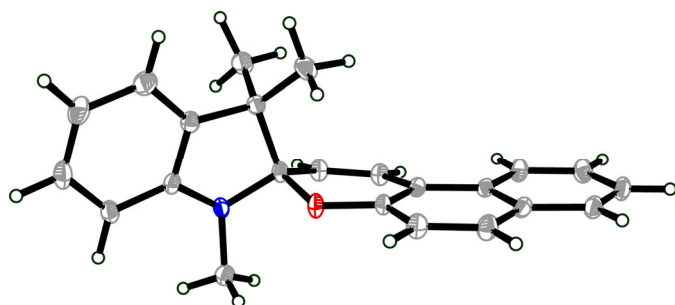

2 at 90 K
